# Supplementary material
Source: publisher figshare collection journal article supplement (https://acs.figshare.com/ndownloader/files/3574584)
Supplement: Supplementary file 1 [file 3574584]

# Parallel accumulation – serial fragmentation (PASEF): Multiplying sequencing speed and sensitivity by synchronized scans in a trapped ion mobility device

*Florian Meier<sup>1‡</sup>, Scarlet Beck<sup>1‡</sup>, Niklas Grassl<sup>1</sup>, Markus Lubeck<sup>2</sup>, Melvin A. Park<sup>3</sup>, Oliver Raether<sup>2</sup>, Matthias Mann<sup>1\*</sup>*

<sup>1</sup> Proteomics and Signal Transduction, Max-Planck-Institute of Biochemistry, Am Klopferspitz 18, 82152 Martinsried, Germany

<sup>2</sup> Bruker Daltonik GmbH, Fahrenheitstr. 4, 28359 Bremen, Germany

<sup>3</sup> Bruker Daltonics Inc., Massachusetts 01821, Billerica, United States

## SUPPORTING INFORMATION

- 1) **Supplementary Figure S-1: Annotated PASEF-MS/MS spectra of the peptides shown in Figure 4.**

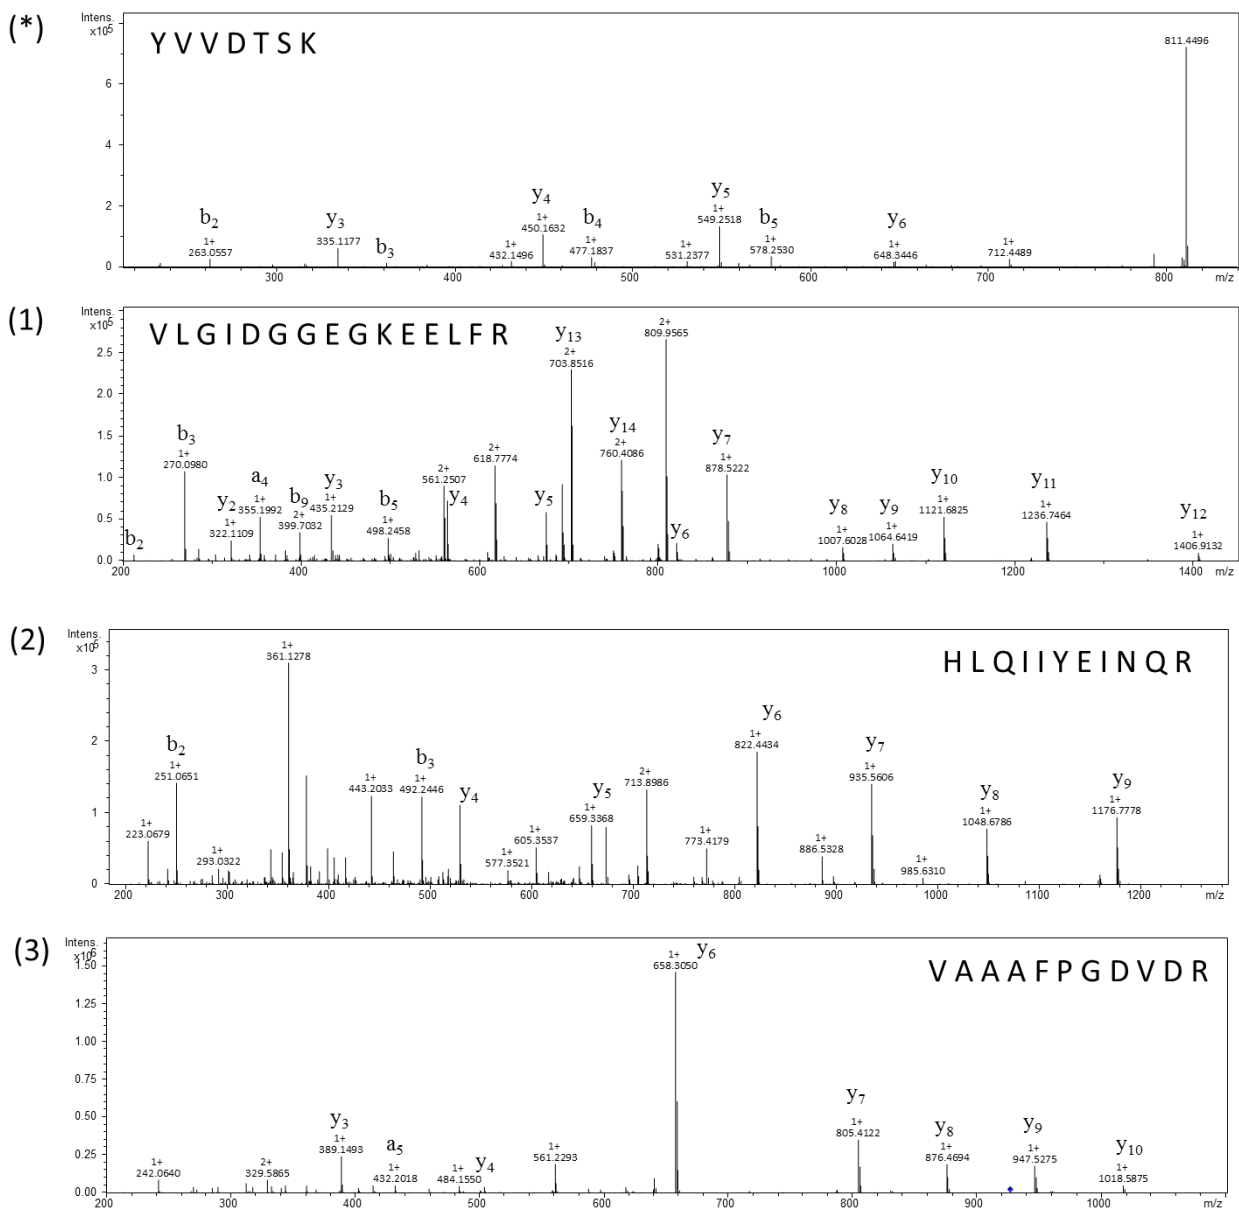

**Figure S-1.** Annotated MS/MS spectra of four peptides measured with the PASEF method as shown in Figure 4.
